# Supplementary material for: Ion Channel Clustering at the Axon Initial Segment and Node of Ranvier Evolved Sequentially in Early Chordates
Source: PLoS Genet. 2008 Dec 26;4(12):e1000317. doi: 10.1371/journal.pgen.1000317 (PMC2597720; doi:10.1371/journal.pgen.1000317)
Supplement: Table S1 — Database of NaV and KCNQ channel genes used in this study. (0.14 MB XLS) [file pgen.1000317.s008.xls]

## Sheet: HumanVGCh
Supplementary Table 1.
Channel Name	Species	Accession No.(nt)	Accession No.(pr.)	Channel Amino Acid Sequence		notes
Sodium Channels
Clam voltage-dependent sodium channel	Mya arenaria	AY847740	AAX14719	FALIGMQLYSGRLRNKCILNVGENLGPNVTDEVWTNFTLNTSNHIETMCGNASTAGQCPEGYECLQYIGENPNFGYTSFDNFGWALLCSFRLMTQDYWENLYMLVLRAEGLPHSFYFIFVILLGSFYLVNLILAIVAMSYEDQQKADQSDAEEARQEKENKLMNEFEDVIHEITKSPSVVSNTSDPQFSPGSESKGEDGVDKISVQSEKNSLDPHHLTVAGTKASFSLPGSPYFRRRRSNPSRLSIKLAKQLRHQAERQPLVHLESLNLPYADDSNAVTPCSDDIRLCTLPSKFSILARKASMRRALEESSRRSSNVSQSSRTSHSRHSPHSPTDKLSFLMEQFERRSKQNQLISAEKTDDPGYDLHKRSKGYCRTPSASQVDPKDVMVLRELIDHVET…
Loligo bleekeri Nav	Loligo bleekeri	D14525	BAA03398	MDEKYTAKNRDKTFVVIEKRFKKNIIHRFSAKRSLFLFTPRNPIRRLAVCIATNVCFDYFLMFTIMINCVFLAMPDISEFAEYIFLGIYTMEMAIKLVAGGFFIDKYTYLRDAWNCLDFTVIMISYITLLLQTINDKVISDITGLRTFRVLRALRTLSIIPGLKTMVNALLRALRMLISVLILILFCLWIFSQAGVQLFGGALRHKCVLQIHGSPAFGKTYDEFYAEHIENSDNWLAKGNGEYVLCGNATGAGPCPTNYTCLPDIGENPNYGYTNFDSIGWSMLISFQLLTQDYWEDVYNKVIRAHSPWTVIYFIVINFFGSLYLMNLMLAVVATAYELEVKNTGKKLQQTAATAREQSLKEQERRNTLTVSEADSHVDDRNCTCCEQCCGCCYNPWLR…
Squid sodium channel	Loligo opalescens	L19979	Q25377	MATAKDLEKGDNPKGRFRLFTRETLFEIERRIAERRAQAEDADSDEEENEPELKPNPKFEAGKGLPPSVEDVPSRYQGRPLEDLDEYYHNNKTFCVIGRDRTLYRFSATKAIFLLSPFNPIRRFAIFILVHPIFSLVVILTIVCNCVFMTMKENPLPVSEWIFTGIYTCEALIKLFARGFILEPFTYLRDAWNWLDFVVIGLAYLTEVVDLGNLSALRTFRVLRALKTVAVIPGLKTIVGALLEAVRRLRDVMILTGFMLSIFALIGMQLYQGALRSKCVRNNDENMTDSEYQKYVSIKANWQENFYGSTLVCGNASGPGKCGENYTCLPEIMDNPNFGYTSFDNFAWAMLCAFRLMTQDYWENLYQLVIRAEGPVHALFFILVIFLGSFYLVNLILAI…
Cockroach Para Nav1	Blattella germanica	U73583	AAC47483	MSDDSSSISEEERSLFRPFTRESLAAIEARIAEEYAKQKELEKKRAEGEVRYDDEDEDEGPQPDATLEQGAPIPVRMQGLFPPELASTPLEDIDPFYHNQRTFVVVSKGKDIFRFSATDAMWILDPFNPIRRVAIYILVHPLFSLFIITTILTNCIFMIMPTTPTIESTEVIFTGIYTFESAVKVMARGFILQPFTYLRDAWNWLDFVVIALAYVTMGIDLGNLAALRTFRVLRALKTVAIVPGLKTIVGAVIESVKNLRDVIILTMFSLSVFALMGLQIYMGVLTQKCIKNFPINGSWGELNDENWHAFCSNNTNWYFPEGAPEVPLCGNSSGAGTCPPDYTCLQGFGENPNYGYTSFDTFGWAFLSAFRLMTQDYWENLYQLVLRSAGPWHMLFFIV…
Cockroach Nav2	Blattella germanica	AF312365	AAK01090	MATPASSNPGPSSTMPTAQKPAPGKAQVKPFTKESLERMENKTVQLVKEYGFQPRRKLSVEDGSVLPGKFEPFPSRLYGRPLEEIDNFIYDETFCVVSKRFRKNYIHRFTATNSFFIFSPWNAIRRTCIFLSTNQYFDYVVMITILLNCVFLAMTDTVEEAEYIFLAIYTAEMIIKSIAKGFILNKYTYLRNPWNWLDFVVITSGYATIGMEVGNLAGLRTFRVLRALKTVSIMPGLKTIINALLHSFKQLAEVMTLTIFCLMVFALFALQVYMGELRNKCVRKIDSSNASDIEWTEWVNDEENWLFTEEDEPVICGNVTGARHCPFGYFCLQVGENPNHGYTSFDNFLWSMLTTFQLITLDYWENVYNMVLPSCGPISVVFFTVVVFFGSFYLINLML…
Drosophila sodium channel para	Drosophila melanogaster	M32078	AAB59195	MTEDSDSISEEERSLFRPFTRESLVQIEQRIAAEHEKQKELERKRAEGEVPRYGRKKKQKEIRYDDEDEDEGPQPDPTLEQGVPIPVRLQGSFPPELASTPLEDIDPYYSNVLTFVVVSKGKDIFRFSASKAMWMLDPFNPIRRVAIYILVHPLFSLFIITTILVNCILMIMPTTPTVESTEVIFTGIYTFESAVKVMARGFILCPFTYLRDAWNWLDFVVIALAYVTMGIDLGNLAALRTFRVLRALKTVAIVPGLKTIVGAVIESVKNLRDVIILTMFSLSVFALMGLQIYMGVLTEKCIKKFPLDGSWGNLTDENWDYHNRNSSNWYSEDEGISFPLCGNISGAGQCDDDYVCLQGFGPNPNYGYTSFDSFGWAFLSAFRLMTQDFWEDLYQLVLR…
Drsosophila DSC1	Drosophila melanogaster	NM_079134	NP_523858	MSDDQATFNDEKAVAKHQVVAYTQRSQVKHENRHIQLVREYGFHPRTKASVEDGDVLPRKFEPFPEHMYGKPLEEIDTFIYEETFCVVSKRFRKNYIHRFTGTKSLFLFYPWSPARRVCVYIATNQFFDYCVMATILFNCIFLAMTETVEEAEYIFLAIYSIEMVIKIIAKGFLLNKYTYLRNPWNWLDFVVITSGYATIGMEVGNLAGLRTFRVLRALKTVSIMPGLKTIINALLHSFRQLAEVMTLTIFCLMVFALFALQVYMGELRNKCVRQVPTDWTNVSHTDWQIWVNDTDNWLYDEDELPVLCGNLTGARHCPFEYVCLCVGENPNHGYTNFDNFMWSMLTTFQLITLDYWENVYNMVLATCGPMSVSFFTVVVFFGSFYLINLMLAVVALSY…
Worm BdNa1	Bdelloura candida	BCU93074	AAC63049	MKEVVNRFRFLTWESVKEGNIRYVESVRRKKEEKAEKINLDKKGKSKDKKASTLAPDPRLEEGKKLSFLLGDCFSKKKFGGQLIDEIDPYYYDKRSFVVINKSKNIYRFTTTKAFFLFSPFNPVRTSAIKILTHPLFSIVVLLTIITNCIIMALNLDIKALEQSFTIIYAAEFLVKAFARGLIINDFTYLRSIWNWLDFLVIGLAYLMFIEPDLGNYSSLRTLRVFRALKTVTILPGMTTVVNALLNSVIKLKDAIVLTLFMLAIFALIGLQLYKGTLTQKCVKEFDNSTMNLDENSTVAWDDIKIFYNSPENWHEPHKVCSNSTAPCPPGYLCFATSEGNPNFGFTNYDTFPWAYLCAFRLMTQDFWEDLYQNTIRANGKIHVFFFMFVIFFGSFYLV…
Aplysia Nav	Aplysia californica	U66915	AAC47457	MDHELAEWTPFRLFTRESLFTIDRRIAEEEAAKHAEKAPPESDDDDEELDEPSHHEENLKPNPKLEAGRKLPPSLEDYPREYVGKPLEDLDEFYHNQKTFVVLKKDKAIFRFSATDAIFLLSPFNPIRRIAIYILVHPIFSLLVMMTILVNCVFMAITSYTPPAFVEHIFLGIYTVEAVVKVLSRGFVLKPFTYLRDPWNWLDFFVISIAYMTMTVKSFGNLQALRTFRVLRALKTISVIPGLKTIVGALLEAVRRLRDVMILTVFVLSIFALIGMQLYSGALRQKCVLNPVPELGTNITHDEWNDWVNNESHWQKDFYDEWQVCGNGTGAGKCGNGTINGTAEWLCLPNIGQNPNHDFTSFDNFGMALLCAFRLMTQDFWESLYHLVLRAVGSAHCLY…
Sea Urchin Nav2	Strongylocentrotus purpuratus	GLEAN3_25997		MLDTPRPPEVEEYIFTTIYSVEMFVKIFARGFALHPHTYMRDAWNWLDFFVIVLAYITFGLVESGVDIGNFNFLRTFRVLRALKTISVVPGLKSIINALIRSTKMLGEVMLLTVFALCIIALLALQLFMGKLTRKCVANIPPVDFNISDEYFFNFTQDPANWLTWNSDPVICSNMTLGGLCPENYTCLEGIGDNPNDGYTNFDNIGYSMLTCFQLITLDYWENVYNNILKAQGPYAVFFFLTTVMFGAFYLINLMLAVVSMAYTEEMENQGKKPIGEGAVDADQDTEMNDGMTDINDAMTENIDSVSGIGSKNDSDSQAKQSTAGGDDDDEEAIPFNEDDPDNLKNYPCCDYNCCCGCCRRNFICTFPHYRRWRKVQYIASWVVLDPLMDLFITLCILG…		Sea Urchin Genome Project http://www.hgsc.bcm.tmc.edu/projects/seaurchin/
C. intestinalis Nav1	Ciona intestinalis	AK115651		EEYSKDSKANPDLEQGKTLPEYLQGDVPDNYKCRPLVDPDPYYDDKNTFIILDQNYVIYRFSATRALYLFGALNIMRRIACRVLVHSYPLPQTVLYIIMVTILVNCIFMTMDTTDKDWVNDYVERVFLGIYTFEMVVKLLSRGFIFSSFTYMRDPWNLLDVSVIFAAFISEILIAFSVGIDNLTVLRAFRVIRALKTISSHAGLKAIVSALIESVKALKDVMILTLFCLSVFALIGLQLFMGSLRQKCIKTWPPSYNETLMRAWNTQNYTNLTEPFNGSLVSLPMPCEPNPAEKCENHTGAWFNESFESWTTDECNHCYVMESPWLCGNGSGTGHCWDGYTCYRAGINPNYNYTSFDNFLWAFLSLFRLMAQDYWENLYQLTLRANGQVYLIFFMLVIF…
C. intestinalis Nav2	Ciona intestinalis			MEKITEEKTDTTEVLDVPSPSKSPLLTVNNANNNSNTTSAVPAPQVVPNVSSFPNRTIDKPIKIIENTHAFVSPDKSPNFSAFQSRPKTAADVRVRALVNTSRPKSAERVRMTDLATGPRAKQRVQNPRLEPQKQNFLKETTSFTSDASNFPAKTDKES*KPDPTLTDGQELPQYYGRFKKSLYNKPILDIDPYYKERGESTFCVVTQRFGTDHVYRFSATRGFFVFSPFQPLRQLAIRIILHPLFDAIVMTTILVNCVFLGLNEEIAAAEYLFTALYTFEMVVKMVGRGFILNPFTYLRDPWNWLDFIVVIIAYATILGSASNVSSLRTFRVVRAFKSVSIVPGLRTIVNALFHSMKPLAEVMFIMCFLLIVVSLIALQAYQGVLRRRCVKHPPSGLS…		Splice isoform 2 ofQ9NY46 Sodium channel protein type III alpha subunit
C. intestinalis Nav3	Ciona intestinalis			PYFQTYIVVNDQGSIFRFSKAESLFLFGQESRLRNAAINLFIKPMFSNFIMLVILFNCACMVLENPPHWVDDYLEYVFTAIYIAEATVKITARGFVLHSFSYLRDPWNWLDFIVIVSALATEILKAIVRSTMLGQIAVLRTFRVLRALKTMSVVPGLRGIVKALLRSIHALKDAVALTVFCVSVFALIGYQLFHGTLRQKCVGLHIPSLNNGTFECANSTSNSTSAEPYCNTMVHMDIADITCLRESQYGGNGSYTSHNASKDLKHWGSRMAYGCSSVPKCDMCPLGYGCYEAGGNPDYGYTSFDHFFLAFLTSFRLVALDSWSRLYYLTLHTIGKTYAIFYIVVVLLGSYYLVNLILAVVYMAYEEQQAVVEEEELSDVPNSEIDVETGRWKMGLITT…		Sodium channel proteintype V alpha subunit
C. intestinalis Nav4	Ciona intestinalis			YSKTPEKLLEPIEDPDPFYKDKKTFLVLNENRLIFRFSEEKSLYLFGRESRFRRHFINILVNKYPFKSIKYLCTFNTKCFEFPRHIFTAIYTIEAAVKIVGRGFVLHRFSYLRDPWNWLDFIVIIAAYVLVIISQTSAGDASKISSLTFLRAIRVLRVFKTVSVIPGLRMIVSALVASTKALKDAMLLSLLGFSMFSLVGFQFFRGTLHHKCFQKSKIPKFNSTNYKFDWKTWTTNPQKYLKNGVAYQLCGNLTGTLQCPAYTMCLKVGSNPNFGFTSFDNFPFAFLSVFRLSLQDNWEELYLQVLETSGPVSVLFFLTMIFLGSYYLVNLILAVVASSYEGQRKSVENALEVEKVELLNEKVRNFGLCPVFLHPTTLNLIFGVHLNFLILCAYRCNLL…		Splice isoform 3 of Q9NY46 Sodium channel protein typeIII alpha subunit
C. savignyi Nav1	Ciona savignyi			EEYSKDAKANADLEQGKTLPEYLQGDVPDGYKCRPLVDPDPYYDDKNTYIILDQNYVIYRFSATRSLYFIGALNIFRRIAARILVHSYPFTHIILFIIMLTILVNCIFMTMDTTDKDWVNDYVERVFLGIYSFEMIVKVISRGFITSSFTYMRDPWNLLDISVIFTAYLSEILIAFHVGIDKLTVLRAFRVIRALKTISAHAGLKAIVSALIESVKALKDVMILTLFCLSVFALIGLQLFMGSLRQKCIKTWPPRLVDFLYNQYNNGSLISLPMPCDPNPAEKCKKQKGWFNESFESWVEDECNFCFVRDSMWLCGNGSGTGYVLATHTLNLMLLLFRHCWEGYTCYRAGPNPNYNYTSFDNFLWAFLSLFRLMAQDYWENLYMLTLRANGQVYLIFFM…
H. roretzi Nav1	Halocynthia roretzi	D17311	BAA04133	MSTTDLLDISIEPLTLEYLRNIDNIPIKSRDRTISNSSKRKGSDNVATPKLHPNPDLEQGKTLPEYLQGDLPDKYLCQALVDPDPFYANKKTYVVFDKNKVIYRFSCEKALFCLGPLNPVRRIANMIYIHSVFNSVIMLTILVNCGFMAYGEDVDIVEKTFLAIYTFEAVVKIFSRGFILSSFTYLRDPWNILDISVIFTAYLDIVMALAQKASDGGKAQKIPGMAALRAFRVLRALKAISAIPGLKAIVAALIESVKALKDVMILTLFCLSVFALIGLQLFMGSLRNKCIRQWPPYVNDELMTMWLTQNYTDFNHSNPLVYLGNLTQVIKPEISVAKPMPCDPNPACNETTIWFNQTWENWMENECNYCFVRGAAWLCGNGTDTGKCWEGYECVLTGE…
H. roretzi Nav2	Halocynthia roretzi	AB042806	BAA95896	METQNSSSSNILSPGSSTVPEMNPIEEELESDYTALTSGYLQGLKTKRKQLKEKKKKAKTKAENSKEKSAENDNHDEYPDPTLADSEVLPQYYGKFPDNLLGVPIEDLDSYYKEKGEETFCVVTDRFSNKYIYRFSASNGFFLLSPFNPLRRLALRITINQFFDYFVMLTIIVNCAFLALDDEIIESEYVFTAIYSLEMIIKMLARGFVLNKFTYLRDLWNWLDFVVVVLAYVTIISTSVTPAGSNFNVSGLRTFRVLRAFKSFTIVPGLKTIVNALLQSLKPLAEVMVIMIFLVVVISLIALQAYQGVLLRKCVLVPTAKDNITTNDQFNAFVTNPGNWNPVDGELLVCGNTSSSGLCPAGYKCMQDIGENPNFGFTNFDHMGWALLTCFQLLTLDYW…
Amphioxus NaV1	Branchiostoma floridae		gw.540.7.1	RKIKEGEIDEDEIEEHEIEDPDPKLSVGCVLPDYLGEFPDDYVGRPLEDIDPYYADKETFIVIAKDRSIFRFSTTSACYIFTPFHPIRRLALYTLVHSLFSTLVMLTILVNCVFMTMTNPPEITEYIFTGIYTFEMTVKLLARGFALTHFSYLRDPWNWLDFGVIGLAYITIFVDLGNLSALRTFRVLRALKTISVVPGLKTLVSALIQSVINLRDVLILTVFALCVFALVALQIYMGQLRQKCIRIIPEFMNISEYLSFWPNSTLPDEYWDNYTSWSGLGDDFLVTVPNITDQIICAEGFRCLPGFGPNPNYGYTNFDSFGWAALASFRLIVQDYWENLYQLILAVAGPVHIMFFIVVIFLGSFYLVNLILAVVAMSYEDASSETVSTTHDLCYYLHE…		Joint Genome Institute Branchiostoma floridae v1.0 http://genome.jgi-psf.org/Brafl1/Brafl1.home.html
Amphioxus NaV2	Branchiostoma floridae		gw.540.6.1	MQTFIVVSKKGEIARFSATNGLWLLSPFCTIRGLALYILVHPYPFHVMGATFINCVFMTMTAPPEMTEYVFTGVYSFEMIVKILARGFILEQFTYLRDAWNWLDFIVILLAYVTMFVDLGNLSALRAFRVLRALKTISVVPGLKTIVKALIESVKNLRDVILLTVFCLAVFSLLALQLYMGTLLNKCVRHLPTDNGTASNVTDEIYMAHINNETNWYYYNGEWPLCGNASGAGQCPTGYTCLPGIGTNPNHGYTSFDTFGYAMLSSFRLITQDYWENLYQLTCSYTVQIQLGGFLIGMLMFIQTLMKLNEDLYCTILPNRAKYRSQQIRTYTYKSITNLDDDDDSSSSSSSSSCSCSGSGSCHSGDCCCECVSVASDAERGSNHSLDKTGSKRGSRSYE…		Joint Genome Institute Branchiostoma floridae v1.0 http://genome.jgi-psf.org/Brafl1/Brafl1.home.html
Lamprey Nav1a	Petromyzon marinus	DQ275144	ABB84815	MCLIVFMMVMVIGNLVVLNLFLALLLSSFSADNLAATDDDGEMNNLQISMQRIHIGIAWLKVFMRAFFAKHFKKNKMDDEDVKVLDEDTKEQCNLNHTSVDIGRGDEEMAGHVDTTGLYPRMVPIAVGESDFETRDTEDQASESDLDGSKEILNDMSSSEGSTVDIKKDGEEVEVLPEQMDEIVEPDACFTDGCVARFKCCQVSTEEGKWRTWWNVRKTCYRIVEHNRFESFIIIMILLSSGALAFEDIYIERRKTIQTVLEYADKVFSYIFVVEMLLKWVAYGFQKYFTNAWCWLDFLIVDVSLVSLTANALGYSELGAIKSLRTLRALRPLRALSRFEGMRVVVNALVGAIPSIMNVLLVCLIFWLIFSIMGVNLFAGKYWKCVNTTDGEMMLLSQV…
Lamprey Nav1b	Petromyzon marinus	DQ275145	ABB84816	MVMVIGNLVLLNLFLALLLSSFSGLSASDEDNEANSLQIAIARIERGVAFIRGYVRGIFAKCIKRGGPGADGSDSNGNDAAALEEGKLLDKSDNCVRNHTALEMETLQSNGQGAGDDTKGSPATDGERAGLLANAVLPVRVPIAKLEAELERRASSSSSSSTSSSSLSLVDGVKKKRYGNGGSSSEASTVDLAPNDVVEEALETDEQEEGPLGCLTDEFVRRHPICDVDVEGGRGLVWWTLRRACFRIVEHNRFETFIVFMILMSSGALAFEDIYIDQRKMIKTVLEYADKVFSYIFVMEMLLKWVAYGFHTYSTNAWCWLDFLIVDVSLVSLAATAMGYSELGAIKSLRTLRALRPLRALSRFEGMRVVVNALVGAIPSIMNVLLVCLIFWLIFSIMG…
Zebrafish Nav1.1a	Danio rerio	NM_200132	NP_956426	MAHMFTPPGPQSLRKFTRESLKAIESRIAEENAKKSKNTEERNKDNECSRKPNSGLEAGKTLPFIYGEVPKGLVSTPLEDLDQFYSNHTTFIVVSKKKEIYRFNATPALYIFSSFNLLRRISIQILVHFLFNFIIICTILANCAFMVYTQTPDWAKNVEYVFTGIYTLEALVKITARGFCVGRFTFLRDPWNWLDFIVIVMAYVTEFVDLGSVSALRAFRVLRALKTISVVPGLKTIVGALIQSVKKLSDVMILTLFCLSVFALVGLQLFMGILKQKCVYSTSFTENKEACYKNKTCRDYINNPSNQYFLPGKKDALICGNSSDAGQCPEGYTCLKAGKNPDYGYTSFDSFGWAFLSLFRLMTQDFWENLYQQTLRAAGKTYMIFFVLVIFLGSFYLVN…
Zebrafish Nav1.1Lb	Danio rerio	DQ149504	ABA54919	MAAQLLVPPGPDSFRPFLPESLAAIEQRIAEEVAQRPKGERRPDDDDENGPKPNRDLEAGKPLPFIYGDVPPHMLSVPLEDLDTYYSNQKTFIVLNRGKAIFRFNATPALYILSPFNPLRRISIRVLVHSLFSFVIMCTILTNCAFMTLSNPPEWAKNVEYTFTGIYTFESLIKILARGFCVGKFTFLRDPWNWLDFSVILMAYVTEFVNLGNVSALRTFRVLRALKTISVIPGLKTIVGALIQSVKKLSDVMILTVFCLSVFALIGLQLFMGNLRQKCVKMPEVNVTDNLTDYSTELHNSTFNWTEYISDSNNYYFIPGRRDALLCGNSSDAGQCPEGFTCIKAGRNPDYGYTSFDTFSWAFLSLFRLMTQDFWENLYQQTLRAAGKPYMIFFVLVIF…
Zebrafish Nav1.4a	Danio rerio	DQ149506	ABA54921	MARLLPPTGTSVFRRFTPESLVEIERLIQEKSTREELEGAEEEPQAPSSDLEAGKCLPMIYGDPPGDLLNTPLEDIDPFYKTQKTFIVISKGNTIFRFSSEPAMFCISPFSIVRRGAIKILIHSLFSMFIMITILSNCVFMTMSNPPAWSKTVEYVFTGIYTFEATVKVLSRGFCIGPFTFLRDPWNWLDFMVISMAYVTEFVDLGNVSALRTFRVLRALKTITVIPGLKTIVGALIQSVKKMIDVMILTIFALAVFALIGLQLFMGNLRQKCIRWPILNSTIFDVYNSNMVNDTTLNVTDTFDFKAYISNEENQYFLEGSLDALLCGNSSDAGRCPEGYTCMKAGRNPNYGYTSYDNFGWAFLALFRLMTQDFWENLFQLTLRAAGKTYMIFFVVVIF…
Zebrafish Nav1.5	Danio rerio	DQ837300	ABI20136	MAAILFPPGPDSLHRFTRESLAGIEQRIAEEEARNAKRYQEDRGDVEPPKPRADLEAGKQLPRIFGDIPSALVGVPLEDIDPFYFQNRRTFIVLNKGKAIFRFSATSALYIFSPFHPIRRASIRILVHSLFSLFIMCTILTNCCFMAMSEPAQWAKYVEYTFTGIYTFESLIKILARGFCIGPFTFLRDPWNWLDFSVILMAYVTEFVDLGNVSALRTFRVLRALKTISVIPGLKTIVGALIQSVKKLADVMILTVFCLSVFALIGLQLFMGNLRQKCVRSASQCLNTTLPTYNNSTFICNNRSWASLEEFFNNEDNFFKVEGAKDALICGNASDAGKCPDGFECLKTGRNPNYGYTSFDTFGWAFLSLFRLMTQDYWENLYHHTLRSAGKAYMVFFVV…
Zebrafish Nav1.6a	Danio rerio	NM_131628	NP_571703	MAAPLLAPPGPNSYKYFTRESLREIEKRIEEEKAKPPPKPDNSYRDDDDENKPKPNGDLEAGKSLPFIYGDIPPGMVATPLEDFDPFYINQKTFVVLNKGKTIFRFSATPALYMISPFNLARRIAIKILIHSVFSMFIMCTILTNCVFMTFSNPPEWSKQVEYTFTGIYTFESAVKIIARGFCIDGFTFLRDPWNWLDFMVISMAYVTEFVDLGNVSALRTFRVLRALKTISVIPGLKTIVGALIQSVKKLSDVMILTVFCLSVFALIGLQLFMGNLRQKCVIWPINITEMFPDVNGSRAFNWDEYILNETNFYFLPDQLDALLCGNSSDSGRCPEGYTCMKAGRNPNYGYTSFDSFGWAFLALFRLMTQDFWENLYQLTLRAAGKTYMIFFVLVIFVG…
Puffer fish voltage-gated sodium channel	Takifugu pardalis	AB030482.	BAA90398	MATILPPPGTALFRHFTRQSLATIERLKEETLIAPKAGAHEEEEPPTPNPDLEAGKSLPMIFGDPPSELLGTPLEDIDPFYKAQKTFVVVTKGNTIYRFNAEPACYILSPFSLVRRGAIKILIHSLIMITILSNCVFMTMSNPPAWSKTVEYVFTGIYTFEATVKVLSRGFCVGPFTFLRDPWNWLDFMVISMAYITEFVDLGNVSALRTFRVLRALKTITVIPGLKTIVAALIQSVKKMVDVMILTVFALAVFALVGLQLFMGNLRHKCIRWPIANETASELFNGTVFNDTLSYNDTTWPNDTLYSNSTFDFTEYIENAENQYFLEGSKDALLCGNGTDAGKCPEGYLCMKAGRNPNYGYTSFDSFGWAFLALFRLMTQDNWESLFQLTLRAGGQTYM…
Frog Nav1.1	Xenopus tropicalis		ENSXETP00000019636	MEQLRIVPPGPDSFRYFTRESLKAIEKRISEEKENNAKQEQKEGEENGPKPNRDLEAGQSLPFIYGDIPPRMVSEPLEDLDPYYANQKTFIVLNKGKTLFRFSATSALYILTPFNPVRQAAIKILVHSLFNMLIMCTILTNCVFMTLSNPPEWTKNVEYTFTGIYTLESLIKILARGFCLEKFTFLRDPWNWLDFSVIVLAYVTEFVNLGNVSALRTFRVLRALKTISVIPGLKTIVGALIQSVKKLSDVMILTVFCLSVFALIGLQLFMGHLRNKCLLWPYNSSGERLNFSVLFCLFFAISEFGICQMVSYLIKYAPDFSTGLFYKLENQKDPLVCGNSSDTGKCPEGYVCVKAGRNPNYGYTSFDTFNWAFLSLFRLMTQDCWENLYQLTLRAAGKT…		Ensembl database www.ensembl.org
Frog Nav1.2	Xenopus tropicalis		ENSXETP00000045061	VDCNGVVSLLGGPSVPTSPVGLLLPEGTTTETEIRKRKSSCYQVPMDLLEDPTARQRALSVASILTNTVEELEESRQKCPPCWYKFANTFLIWDCCENWLTVKHIVKLIVMDPFVDLAITICIVLNTLFMAMEHYPMTKEFNDVLSIGNLVFTGIFTAEMVFKLIALDPYYYFQEGWNIFDGIIVSLSLMELGLANVEGLSVLRSFRLLRVFKLAKSWPTLNMLIKIIGNSVGALGNLTLVLAIIVFIFAVVGMQLFGKSYKECVCKIAENCELPRWHMNDFFHSFLIVFRVLCGEWIETMWDCMEVAGQSMCLLVFMLVMVIGNLVVLNLFLALLLSSFSSDNLTATDDDNEMNNLQIAVGRIQRGIDYVKKTIRECIQKAFVKKQKGLDEIKPLEEL…		Ensembl database www.ensembl.org
Chicken NaV1.1	Gallus gallus	XM_422021	XP_422021	MAQAMLVPPGSDCFFYFTRESLAAIEKRIADEKSNRDKDEHKDDGGHEEVQPTPNNDLEAGKTLPFIYGDIPPEMVSEPLEDLDPYYINKKTFIVLNKGKTIFRFSATSALYLLSPFNVIRRVAIKILVHSLFSMLIMLTILTNCVFMTWSKLPEWTKNVEYTFTGIYTFEFLVKILARGFCIDDFTCLRDPWNWLDFVVISFAYITEFVNLGNVSALRTFRVLRALKTISVIPGLKTIVGALIQSVKKLSDVMILTVFCLSVFALIGLQLFMGNLKNKCLLWPSRNSTSFEKYLAPYFNDTVFDWAAYIENESHFYRLEGQKDYLLCGNSSDAGKCPEEFICVKAGRNPNYGYTSFDTFSWAFLSLFRLMTQDYWENLYQLTLRAVGKTYMIFFVLVI…
Rat Nav1.1	Rattus norvegicus	X03638	CAA27286	MEQTVLVPPGPDSFNFFTRESLAAIERRIAEEKAKNPKPDKKDDDENGPKPNSDLEAGKNLPFIYGDIPPEMVSEPLEDLDPYYINKKTFIVLNKGKAIFRFSATSALYILTPFNPLRKIAIKILVHSLFSMLIMCTILTNCVFMTMSNPPDWTKNVEYTFTGIYTFESLIKIIARGFCLEDFTFLRDPWNWLDFTVITFAYVTEFVDLGNVSALRTFRVLRALKTISVIPGLKTIVGALIQSVKKLSDVMILTVFCLSVFALIGLQLFMGNLRNKCVQWPPTNASLEEHSIEKNVTTDYNGTLVNETVFEFDWKSYIQDSRYHYFLEGVLDALLCGNSSDAGQCPEGYMCVKAGRNPNYGYTSFDTFSWAFLSLFRLMTQDFWENLYQLTLRAAGKTY…
Rat Nav1.2	Rattus norvegicus	NM_012647	NP_036779	MARSVLVPPGPDSFRFFTRESLAAIEQRIAEEKAKRPKQERKDEDDENGPKPNSDLEAGKSLPFIYGDIPPEMVSEPLEDLDPYYINKKTFIVLNKGKAISRFSATSALYILTPFNPIRKLAIKILVHSLFNVLIMCTILTNCVFMTMSNPPDWTKNVEYTFTGIYTFESLIKILARGFCLEDFTFLRNPWNWLDFTVITFAYVTEFVNLGNVSALRTFRVLRALKTISVIPGLKTIVGALIQSVKKLSDVMILTVFCLSVFALIGLQLFMGNLRNKCLQWPPDNSTFEINITSFFNNSLDWNGTAFNRTVNMFNWDEYIEDKSHFYFLEGQNDALLCGNSSDAGQCPEGYICVKAGRNPNYGYTSFDTFSWAFLSLFRLMTQDFWENLYQLTLRAAGK…
Rat Nav1.4	Rattus norvegicus	NM_013178	NP_037310	MASSSLPNLVPPGPHCLRPFTPESLAAIEQRAVEEEARLQRNKQMEIEEPERKPRSDLEAGKNLPLIYGDPPPEVIGIPLEDLDPYYSDKKTFIVLNKGKAIFRFSATPALYLLSPFSIVRRVAIKVLIHALFSMFIMITILTNCVFMTMSNPPSWSKHVEYTFTGIYTFESLIKMLARGFCIDDFTFLRDPWNWLDFSVITMAYVTEFVDLGNISALRTFRVLRALKTITVIPGLKTIVGALIQSVKKLSDVMILTVFCLSVFALVGLQLFMGNLRQKCVRWPPPMNDTNTTWYGNDTWYSNDTWYGNDTWYINDTWNSQESWAGNSTFDWEAYINDEGNFYFLEGSNDALLCGNSSDAGHCPEGYECIKAGRNPNYGYTSYDTFSWAFLALFRLMTQ…
Rat Nav1.5	Rattus norvegicus	M27902	P15389	MANLLLPRGTSSFRRFTRESLAAIEKRMAEKQARGGSATSQESREGLQEEEAPRPQLDLQASKKLPDLYGNPPRELIGEPLEDLDPFYSTQKTFIVLNKGKTIFRFSATNALYVLSPFHPVRRAAVKILVHSLFSMLIMCTILTNCVFMAQHDPPPWTKYVEYTFTAIYTFESLVKILARGFCLHAFTFLRDPWNWLDFSVIVMAYTTEFVDLGNVSALRTFRVLRALKTISVISGLKTIVGALIQSVKKLADVMVLTVFCLSVFALIGLQLFMGNLRHKCVRNFTELNGTNGSVEADGLVWNSLDVYLNDPANYLLKNGTTDVLLCGNSSDAGTCPEGYRCLKAGENPDHGYTSFDSFAWAFLALFRLMTQDCWERLYQQTLRSAGKIYMIFFMLVIF…
Rat Nav1.6	Rattus norvegicus	AF049239	AAC26014	MAARLLAPPGPDSFKPFTPESLANIERRIAESKLKKPPKADGSHREDDEDSKPKPNSDLEAGKSLPFIYGDIPQGLVAVPLEDFDPYYLTQKTFVVLNRGKTLFRFSATPALYILSPFNLIRRIAIKILIHSVFSMIIMCTILTNCVFMTFSNPPEWSKNVEYTFTGIYTFESLVKIIARGFCIDGFTFLRDPWNWLDFSVIMMAYVTEFVDLGNVSALRTFRVLRALKTISVIPGLKTIVGALIQSVKKLSDVMILTVFCLSVFALIGLQLFMGNLRNKCVVWPINFNESYLENGTRGFDWEEYINNKTNFYMVPGMLEPLLCGNSSDAGQCPEGFQCMKAGRNPNYGYTSFDTFSWAFLALFRLMTQDYWENLYQLTLRAAGKTYMIFFVLVIFVGS…
Rat Nav1.7	Rattus norvegicus	RNU79568	O08562	MAMLPPPGPQSFVHFTKQSLALIEQRISEEKAKEHKDEKKDDEEEGPKPSSDLEAGKQLPFIYGDIPPGMVSEPLEDLDPYYADKKTFIVLNKGKAIFRFNATPALYMLSPFSPLRRISIKILVHSLFSMLIMCTILTNCIFMTLSNPPEWTKNVEYTFTGIYTFESLIKILARGFCVGEFTFLRDPWNWLDFVVIVFAYLTEFVNLGNVSALRTFRVLRALKTISVIPGLKTIVGALIQSVKKLSDVMILTVFCLSVFALIGLQLFMGNLKHKCFRKELEENETLESIMNTAESEEELKKYFYYLEGSKDALLCGFSTDSGQCPEGYICVKAGRNPDYGYTSFDTFSWAFLALFRLMTQDYWENLYQQTLRAAGKTYMIFFVVVIFLGSFYLINLILA…
Human Nav1.1	Homo sapiens	AF225985	AAK00217	MEQTVLVPPGPDSFNFFTRESLAAIERRIAEEKAKNPKPDKKDDDENGPKPNSDLEAGKNLPFIYGDIPPEMVSEPLEDLDPYYINKKTFIVLNKGKAIFRFSATSALYILTPFNPLRKIAIKILVHSLFSMLIMCTILTNCVFMTMSNPPDWTKNVEYTFTGIYTFESLIKIIARGFCLEDFTFLRDPWNWLDFTVITFAYVTEFVDLGNVSALRTFRVLRALKTISVIPGLKTIVGALIQSVKKLSDVMILTVFCLSVFALIGLQLFMGNLRNKCIQWPPTNASLEEHSIEKNITVNYNGTLINETVFEFDWKSYIQDSRYHYFLEGFLDALLCGNSSDAGQCPEGYMCVKAGRNPNYGYTSFDTFSWAFLSLFRLMTQDFWENLYQLTLRAAGKTY…
Human Nav1.2	Homo sapiens	AF327226	AAG53412	MAQSVLVPPGPDSFRFFTRESLAAIEQRIAEEKAKRPKQERKDEDDENGPKPNSDLEAGKSLPFIYGDIPPEMVSVPLEDLDPYYINKKTFIVLNKGKAISRFSATPALYILTPFNPIRKLAIKILVHSLFNMLIMCTILTNCVFMTMSNPPDWTKNVEYTFTGIYTFESLIKILARGFCLEDFTFLRDPWNWLDFTVITFAYVTEFVNLGNVSALRTFRVLRALKTISVIPGLKTIVGALIQSVKKLSDVMILTVFCLSVFALIGLQLFMGNLRNKCLQWPPDNSSFEINITSFFNNSLDGNGTTFNRTVSIFNWDEYIEDKSHFYFLEGQNDALLCGNSSDAGQCPEGYICVKAGRNPNYGYTSFDTFSWAFLSLFRLMTQDFWENLYQLTLRAAGK…
Human Nav1.4	Homo sapiens	NM_000334	NP_000325	MARPSLCTLVPLGPECLRPFTRESLAAIEQRAVEEEARLQRNKQMEIEEPERKPRSDLEAGKNLPMIYGDPPPEVIGIPLEDLDPYYSNKKTFIVLNKGKAIFRFSATPALYLLSPFSVVRRGAIKVLIHALFSMFIMITILTNCVFMTMSDPPPWSKNVEYTFTGIYTFESLIKILARGFCVDDFTFLRDPWNWLDFSVIMMAYLTEFVDLGNISALRTFRVLRALKTITVIPGLKTIVGALIQSVKKLSDVMILTVFCLSVFALVGLQLFMGNLRQKCVRWPPPFNDTNTTWYSNDTWYGNDTWYGNEMWYGNDSWYANDTWNSHASWATNDTFDWDAYISDEGNFYFLEGSNDALLCGNSSDAGHCPEGYECIKTGRNPNYGYTSYDTFSWAFLAL…
Human Nav1.5	Homo sapiens	M77235	Q14524	MANFLLPRGTSSFRRFTRESLAAIEKRMAEKQARGSTTLQESREGLPEEEAPRPQLDLQASKKLPDLYGNPPQELIGEPLEDLDPFYSTQKTFIVLNKGKTIFRFSATNALYVLSPFHPVRRAAVKILVHSLFNMLIMCTILTNCVFMAQHDPPPWTKYVEYTFTAIYTFESLVKILARAFCLHAFTFLRDPWNWLDFSVIIMAYTTEFVDLGNVSALRTFRVLRALKTISVISGLKTIVGALIQSVKKLADVMVLTVFCLSVFALIGLQLFMGNLRHKCVRNFTALNGTNGSVEADGLVWESLDLYLSDPENYLLKNGTSDVLLCGNSSDAGTCPEGYRCLKAGENPDHGYTSFDSFAWAFLALFRLMTQDCWERLYQQTLRSAGKIYMIFFMLVIFL…
Human Nav1.6	Homo sapiens	NM_014191	NP_055006	MAARLLAPPGPDSFKPFTPESLANIERRIAESKLKKPPKADGSHREDDEDSKPKPNSDLEAGKSLPFIYGDIPQGLVAVPLEDFDPYYLTQKTFVVLNRGKTLFRFSATPALYILSPFNLIRRIAIKILIHSVFSMIIMCTILTNCVFMTFSNPPDWSKNVEYTFTGIYTFESLVKIIARGFCIDGFTFLRDPWNWLDFSVIMMAYITEFVNLGNVSALRTFRVLRALKTISVIPGLKTIVGALIQSVKKLSDVMILTVFCLSVFALIGLQLFMGNLRNKCVVWPINFNESYLENGTKGFDWEEYINNKTNFYTVPGMLEPLLCGNSSDAGQCPEGYQCMKAGRNPNYGYTSFDTFSWAFLALFRLMTQDYWENLYQLTLRAAGKTYMIFFVLVIFVGS…
Human Nav1.7	Homo sapiens	X82835	Q15858	MAMLPPPGPQSFVHFTKQSLALIEQRIAERKSKEPKEEKKDDDEEAPKPSSDLEAGKQLPFIYGDIPPGMVSEPLEDLDPYYADKKTFIVLNKGKTIFRFNATPALYMLSPFSPLRRISIKILVHSLFSMLIMCTILTNCIFMTMNNPPDWTKNVEYTFTGIYTFESLVKILARGFCVGEFTFLRDPWNWLDFVVIVFAYLTEFVNLGNVSALRTFRVLRALKTISVIPGLKTIVGALIQSVKKLSDVMILTVFCLSVFALIGLQLFMGNLKHKCFRNSLENNETLESIMNTLESEEDFRKYFYYLEGSKDALLCGFSTDSGQCPEGYTCVKIGRNPDYGYTSFDTFSWAFLALFRLMTQDYWENLYQQTLRAAGKTYMIFFVVVIFLGSFYLINLILA…
KCNQ Channels
Worm KQT-1	Caenorhabditis elegans	NM_171709	NP_741819	MSQASQEDNDGGDLLSPESPMTPDGMILARMPWHPGLIGNWNTVKSVSCSMLNGDETDQAAPSDEQQEAGSSSAIGQESRKTVVFQEPDIGFPSEHDQLTTLHDSEEGNRKMSLVGKPLTYKNYRTDQRFRRMQNKMHNFLERPRGWKAATYHLAVLFMVLMCLALSVFSTMPDFEVNATIVLYYLEIVFVIWLATEYICRVWSAGCRSRYRGISGRIRFATSAYCVIDIIVILASITVLCIGATGQVFAASAIRGLRFFQILRMLRIDRRAGTWKLLGSVVWAHRQELLTTVYIGFLGLIFSSFLVYLCEKNTNDKYQTFADALWWGVITLSTVGYGDKTPETWPGKIIAAFCALLGISFFALPAGILGSGFALKVQQHQRQKHLIRRRVPAAKLIQC…
Worm KQT-2/kvqlt2	Caenorhabditis elegans	NM_076991	NP_509392	MMFVATNRRKKEGENKDDEMKAGFEDNADIANDEEQGYNSADQIIDINVGGKRFQTYNKTLERFPLSLLGDTERRNQFYNPNTGELFFDRHRPTFESILYYYQSGGIMARPPNIPIHIFVNELIFFDIGDKLIEKLQIDNGLKELQVVEDLPNYEPFKALWQFLENPDSSNAAKIFAILSVVIIVVSLIMFVIETLPVFAPKELLTNNGTIYKTVYSEHATWMFTVNTAVICWFTIEFILRLICCPNKIKFFLNTGNIIDFLSILPYYLSLVLVSSSKGSFSMLRVIRVLRVFKLSRHSRGLQILGNTLKASFNELMMLAFFLFVMILIFGSCVYYAEYKEPGTKFISIPSSFWWAIVTMTTVGYGDMHPVTFWGQIVGSMAVVCGVLTIALPVPVVVS…
Worm KQT-3	Caenorhabditis elegans	AY572975	AAT77228	MFNARYRNIKEKKAAKMTYRAMIYNCLERPTGWKCFLYHFSVFLIVLICLILSVLSTVEEHSHFAAELLYILEIVLVVFFSVEFIVRLWSAGCRSKYIGVYGRLKFVRKPITLIDLVVVICSLFVICFGTEGQVFAASAMRGIRFLQILRMLHVDRQGGTWRLLGSVVFIHRQELITTLYIGFLGLIFSSYFVYLAEKDHIGVDGRQAFTSYADALWWGVITMTTIGYGDVVPQTWLGRIVASCFSIFAISFFALPAGILGSGFALKVQQKQRQKHFNRQIPAAATLIQCLWRCHAAEKKVSATWNAHIDPLAHETKETHHWNGKKHASSMDSNNLTRKRQLFKKQSSLVNTFRRKGSPSTDVEMGELQQERLLRHERNSDTDDEKRIYRVGADIEIDY…
Beetle KCNQ1	Tribolium castaneum	XM_966797	XP_971890	MTSGTSSPTPTDSPSLSQRPLLTAITPIPKKTVEFETMPAKRSDAAAKDPESLTLRQKRGRLTQPRMSLLGRPLNYRASRRDARYRRIQSRVYNFLERPRGVAIFYHMIVFLMVFTCLTLSVFSTIETYEDMTVQVLTYMESFVVIWFAIEFSLRLWSSGCRSRYQGYIGRLKFLRRPFCIIDVITIVASIVVLVMRSRGQVLATSALRGLRFFQILRMVRMDRRGGTWKLLGSVVYAHRQELITTLYIGFLGLIFASFLVFLAEKDVNKNFSNFAQALWWGVITLCTVGYGDMVPETWQGKIIASFCALLGISFFALPAGILGSGFALKVQQQQRQKHMIRRRQPAAMLIQSLWRCYAADEHSLSVATWKIHQVPLPSPPSRVSSSFKHNASFVSRLP…
Bee KCNQ1	Apis mellifera	XM_392151	XP_392151	MKSDSKPLLTAQAEKANHYTYLKEFRVEQCPLFIQRKCTQHRPFTCFNWHFMNQRRRRPVRKRDRTFNYSADNYCTKYDETTGICPDGDEFMVVLVCLIFSVLSTIEQYSNFANETLFWMEICLVVFFGVEYLVRLWSAGCRSKYMGCCGRLRFIRKPICIIDLIVVVASMVVLSVGSNGQVFATSAIRGIRFLQILRMLHVDRQGGTWRLLGSVVFIHRQELITTLYIGFLGLIFSSYFVYLAEKDVIGPDGKTDFSSYADALWWGVITVTTIGYGDTVPQTWMGKIVASCFSVFAISFFALPAGILGSGFALKVQQKQRQKHFNRQIPAAAMLIQCLWRCYAADKTRTYLTSRAPGVQSLMIQVAKKASVLKRRKSRNRMDVQQQQQQSLPPVTISG…
Fruit Fly KCNQ	Drosophila melanogaster	NM_176119	NP_788299	MSLLGKPLNYNRGTRRDVRYRRLQSRLYNFLERPRGLHAIFYHVMVFLMVFTCLALSVFSTIKEYEEDAVYILFRMEILVVIWFTMEFGARLWSSGCRSRYQGCLGRLKFVKRPFCIIDIVTILASIVVLGMGTSGQVFATSALRGLRFFQILRMVRMDRRGGTWKLLGSVVYAHRQELITTVYIGFLGLIFASFLVYMWEKDVNDKFSNFAQALWWGVITLCTVGYGDMVPITWQGKLIASCCALLGISFFALPAGILGSGFALKVQQQQRQKHMIRRRQPAATLIQAVWRCYAADEHSVSVATWNIHRVALPSPPASRASSSFKHNTSFVARLPTIRRHKSQTIQTPGGGDGGGVSKPPGSSRASTRYTRTIRDINASVENLDEEDEPRCTQLTNRH…
C. intestinalis KCNQ1	Ciona intestinalis	pending		MIGPDARTLKAIKDLKETKTKHRHFQQQAYNFLERPTGVKCFVYHVLVFMMVLICLIFSVLSTIEGQERNNVKPLLVMEAILVVVFTIEYFVRLWSAGSIGKYRGCLGRLRFARKPICVIDLMVVSASVVILLVGRNGNVFAASAIRGIRFLQILRMLHVDRQGGTWRLLGSVVYIHRQELITTLYIGFLALIFSSYFVYLAEKPAPESFKNGTSPTGKFRSYADALWWGVVTVTTIGYGDHVPITWLGKVIASCFSIFAISFFALPAGILGSGFALKVQQKQRQKQFNRQIPAAAALIQATWRCYATSVGTNCSATWRLFKIAGNHRNSDVTNCDEVFIEETQPRPNTTKKSRCALSRLHLDIPIFRTRPPLSKEDKSQSIPFEIGIDVDENPADGMP…
C. intestinalis KCNQ5	Ciona intestinalis	pending		MSDVQNPGGTPKVARVTFHDVTESDDSATERQEPRPMPQGILRRPSNFPFSLKMPFQSLHEDNKSNHDSDSIHSLGESEINRRRPSLAVQIITAPVRWVPNHHNHHQEYRKRKMSLHGKPIYFTVPSKRKSRMLQMRIEAYNFLERPNFKPYSIFYHTFTFLLVFGCLVLSVLSTIPNHMEKANKILFIVEVLILILFGLELGVRIWSAGCRCRYQGFLGRMRFCKKPLCVIDIIVVMSSFVVLCIGSNGHMFAATAMRSLRFLQILRMVRMDRRGGSWKLLSSVVRAHSKELITAWYIGFLALIFASFLVYQAEKDENSKEFETFADALWWGLITLTTIGYGEKVPITWLGRLIASVFAILGISFFALPAGILGSGFALKVQEQNRQKHFARRRMPAA…
C. savigny KCNQ5	Ciona savigny	pending		MSLHGKPIYFTLPSKRKSRLLIRRLQSIVFNFIERPRGIQILYHVCMFLLVFGCLVLSVLATIPAHMESANQEVIILIVFGLELGIRIWSAGCRCRYQGFLGRMRFCKKPLCIIGEIDIIVVLSSFIVLCIGSNGQMFAATAMRSLRFLQILRMVRMDRRGGSWKLLSSVVKAHSKQELITAWYIGFLALIFASFLVYQAEKDENSKDFETFADALWWGLVSITLTTIGYGEKVPITWLGRLIASVFAILGISFFALPAGILGSGFALKVQEQHRQKHFARRRMPAAYLLQCMWRCYAADKNSRSVATWKPHLRTQNSKKSKTRISSSPKLSRRQTFRSRLGGSVKTSFTPTPPLLGVDTITPSLPGYSTSRTEVIVKSQSLAERLSDRITRQNSIRVP…
Sea Urchin KCNQ1	Strongylocentrotus purpuratus		hmm66896	MYPYFSTCSFHDPIPFTDRGRGFRDELNLDMYPYFSTCSFHDPIPFTDMGRGFRDELNLDMYPYFSTCSFHDPIPFLFPAQLVQEIFLVVFFSCEYVVRLWSAGCRQQYQGLRGRLRFARKPILIIDLIVVISSTAVMCFGSEGQVFAASAIRGVRFLQILRMLHIDRQGGTWRLLGSVVFIHRQELITTLYIGFLGLIFTSYFVYLAEKDHIDAKGICQFETYADALWWGVVTVTTIGYGDKVPNTWLGKMIASCFSIFAISFFALPAGILGSGFALKVQHKQRQKHFSRQIPAAATLIQCAWRLYASNQEGFKSEATWKIHLAPSTPNLQQSVPNQLSGVVNSVKPHLALKRRKSSKLSLKEALLPTTLLELSGIKTHSQRTMRMGDIVCLDPHDEM…
Sea Urchin KCNQ	Strongylocentrotus purpuratus		hmm134582	MF*IL*EIIAVLILSTECTLRIWSAGCRSRYQGHYGRLRFIRRPLCILDIVVVIASVLIIVIGSSNGTFLDPAFRGLRFIQILRMVRVDRRGNTWKLLGSVVWAHRQELLTTWYIGFLALISVSFLVYTLEHGSPDDDYKTLPDAMWYGLVTLTTVGYGDKTPNSWSGKLAAAIFAIIGISFFALPAGILGSGFALQVQQQQRQKHFARRRHPAAQLIQCLWRCYAADPNSSSTATWKPHIKPVHSPTTGSFRSNNFISRLSMKRNNNTANSPMMHRTSERLKKSDRDCEDGDHEEKKTMLSVRLSNGSHGGLFDDEEPPVRVTKLTEAHKNAIRAVRKIKYFVARRKFKEAFRPYDVKDVIEQYSSGHADMLARIKNLQARLDQILGKSGMERRKGRG…
Lamprey KCNQ1	Petromyzon marinus	pending		MSHGKRSSSHKGPARAIQEATSVERMQVPVSPVRLEMSETAETRVGEASWDDMLSPGQHAVEATPQVALHGLPHDPRRGRRVSTYSQLLMCGRTSTIQSRVYNFLERPTGWKCFLYHFSVFMMVLICLIFSVLSTIELYTDFANSTLYWMVIALVVFFGVEYLVRLWSAGCRSKYVGVMGRVRFAHKPISIIGELVVVVASIIVLCVGSNGQVFATSAIRGIRFLQILRMLHVDRQGGTWRLLGSVVFIHRQELITTLYIGFLGLIFSSYFVYLAEKDEAREKNEFASYADALWWGVVTVTTIGYGDKVPQTWIGKTIASCFSVFAISFFALPAGILGSGFALKVQQKQRQKHFNRQIPAAATLIQRLTESHKIAIRVIRRMQYFVARSKFQQAKKPYD…
Lamprey KCNQ4	Petromyzon marinus	pending		FTLVFSCLVLSVFSTVPQYQDLASEGLLILEYIMIVVFGIEYIARIWAAGCCCRYRGWRGRLKFSRKPFCVIIIVLIASLAVLAAAGTQGNVFATSALRSLRFLQILRMVRMDRRGGTWKLLGSVVYAHQELITAWYIGFLVLVFSSFLVYLAEKDENQKEFGTYADALWWGTITLTTIGYGDKCPVTWVGRLMAASFALLGISFFAMPAGILGSGFALKVQEQHRQKHFEKRRSPAAGLIQAAWRLHSTDASRPHLIATWRFYYDCIPSLSQKVGLRERLSSPVTQLMRSRPGGSYGPPRRTLSADSSVQGLGGPPIPPHGTPGHGDVVNNNPLRATTKGRSHSLGLGERARRRTSLRLGRAAGARSTHETGVFLEGGSEESGCFLDEAPQDFEPSVK…
Lamprey KCNQ5	Petromyzon marinus	pending		EGIMMVLFGLEYFLRIWAAGCCCRYRGWQGRLRFARKPFCIISIVLVASLAVIAAGTQGNIFATSALRSLRFLQILRMVRMDRRGGTWKLLGSVVYAHQELITAWYIGFLALVFSSFLVYLAEKDDNKDQFATYADALWWGTITLTTIGYGDKTPKTWLGRMLAAGFALLGISFFALPAGILGSGFALKVQEQHRQKHFEKRRCPAARLMQCTWRCYAADVKSLSVATWKPHLKALHTCSPVNYKPSFRERVRLSSPRGQTGRGKSASPAGRARAPGVGGVRRSPSADTGLENSPAHVQKSWSFNDRTRFRPSLRLRSSSSRHYSGEGGYASLSVDDALDQKRCHCDVSVEDLTPALKTVIRAVRIMKFHVAKRKFKETLRPYDVKDVIEQYSAGHLDM…
Frog KCNQ3	Xenopus tropicalis		ENSXETP00000049797	HALTFLIVLGCLILAILTTFKEYEDASGDWLLLLETFALVIFGVEFALRIWAAGCCCRYKGWRGRLKFARKPLCMLGKYWSQTAALIVYTVKQGSLAPPQLPTTRDMGNNDTTGGTSFILSGLYYSGSQELITAWYIGFLTLILSSFLVYLVEKDVPERNEKGELVEEEFETYADALWWGLITLATIGYGDKTPKTWEGRLIAATFSLIGVSFFALPAGILGSGLALKVQEQHRQKHFEKRRKPAAELIQSAWRFYATNLSRIDLIATWRYYETTVQFPYFRQVFRKQLGSCSASKSSLLLAEMRGSRDSTFLLSPRNPNQNQLCVLPEAGGLLLNNPLQLYIIFRLTKIQSLWSKNDAGAAGEPIAESGYGAEAMLEDLIPTIKAAIHASRILQFLLH…		Ensembl database www.ensembl.org
Shark KCNQ3 exons 5-7	Callorhinchus milii	AAVX01215360.1, AAVX01215360.1, AAVX01229763.1		ITLTTIGYGDKTPKTWAGRVLASMFALIGVSFFALPAGILGSGLALKVQEQHRQKHFEKRRNAAWRFYATNLNRTDLGATWRYYESVVTVPFF		Elephant Shark genome project http://esharkgenome.imcb.a-star.edu.sg/
Zebrafish KCNQ1	Danio rerio	NM_001080566 XM_680578	NP_001074035, XP_685670	MTSPAHSTATEASWTAGAADLQMTEALHLRNDGVRFPSSVPVDPAVITQHPPSHLHPRMSVYSATRPTLSRSFLQGRVYNFLERPTGWKCFVYHFTVFLIVLSCLILSVLSTIDEYQALANKTLFWMELVLVMFFGVEYVVRLWSAGCRSKYVGILGRLRFARKPISVIDLIVVVASIIVLAFGSNGQVFATSAVRGVRFLQILRMLHVDRQGGTWRLLGSVVFIHRQELITTLYIGFLGLIFSSYFVYLAEKDAVDDHGNSGFGSYADALWWGVVTVTTIGYGDKVPQTWIGKTIASCFSVFAISFFALPAGILGSGFALKVQQKQRQKHFNRQIPAAASLIQASWRCFALLNPDSATYKLFVKRNLSSSGSSPKLKVKMRRKMKISDRNNGQNSPAV…
Zebrafish predicted KCNQ2 c term fragment	Danio rerio	XM_694873		MTHEASLPEDLGDDRGYNCEFLPHLSPGLKVTIRSICVMRFLLSKRRFKESLRPYDVMDVIEQYSAGHLDMLSRIKNLQSRIDLIVGPPPPSTPRHKKYVNPPPPPPSPLMVYWIIKVDQIVGKGASAGEKDKPKSDTEVPEDPSMMGRLNKMEKEVGAMDLKLNFLVSIYTAQMGIPRSETEALLGFKIAYPAPPYHSPDEKSEKVPDEDENKGKSPSPINPGPNGTLTESQCRPSTSWHQQDEHPLSVPLWNNSRGVSPIGTDDPSLYRLPPPPFHESMDNSRSRRSRRPVQQQAAVESDTSLSIPSVDHEELDRSFSGFSISQAREEDYVPPVSLGPFGGGGGTLCTRIRPYLAEGESDTDSDLYTPGAPSPLSFTGEGTFGDRMWPGMK
Zebrafish predicted KCNQ2 n term fragment	Danio rerio	XM_694522		MVKKSANGEVYLPPAGEKKPKVGFVGLDPGAAETSRDGALLIAGSESTKRGSILCRPRSSISRGSIAHKRNARYRRLQNFLYNALERPRGWAFIYHAYVFVLVFSCLVLSVFATIKEYKKSSESALYILEIVTIVVFGVEYIVRIWAAGCCCRYRGWRGR
Zebrafish predicted KCNQ3	Danio rerio	XM_692257	XP_697349	MGIRSRNAANSAEDSRERKSALAGDLEQCAGQERDGALLLVGSGREVDFKRGSQNIGLLAKTPLGYTRPVKRNNIRKRRIQNLIYDALERPRGWALLYHAFVFLIVLGCLILSILTTFKEHEKDSAHWLVILETFTIFIFGGEFALRIWAAGCCCRYKGWRGRLKFARKPLCVLDIFVLIASVPVVAVRNQGNVLATSLRSLRFLQILRMLRMDRRGGTWKLLGSAIYTHSKELITAWYIGFLSLILASFLVYLVEKDDETTELHRDTDGPSPTPAPQDFDTYADALWWGLITLTTIGYGDKTPKTWAGRLLAGTFALIGVSFFALPAGILGSGLALKVQEQHRQKHFEKRRHPAASLIQAAWRYYSTNPVREDLIATWRFYETVISLPCFRKDPLEVM…
Zebrafish KCNQ2	Danio rerio	XM_694522 XM_694873		MVKKSANGEVYLPPAGEKKPKVGFVGLDPGAAETSRDGALLIAGSESTKRGSILCRPRSSISRGSIAHKRNARYRRLQNFLYNALERPRGWAFIYHAYVFVLVFSCLVLSVFATIKEYKKSSESALYILEIVTIVVFGVEYIVRIWAAGCCCRYRGWRGRLRFARKPFCIIDIMVLFASVSVLAAGSQGNVFATSAIRSLRFLQILRMLRMDRRGGTWKLLGSVVYAHSKTLTTIGYGDKFPVTWNGRLIAATFSLIGVAFFALPAGILGSGFALKVQEQHRQKHFEKRRNPAAGLIQAAWRFHATNLSRTDLFSTWDFYAQTVSVPMYRLIPPVNQLDILRSLKGKSAFRKDSQIDVTPSRKPSVKEKGSPSKSTGGKEARTDGVKESPSKVTKSLSF…
zebrafish KCNQ5	Danio rerio	XM_679763	XP_684855	MVTLLQNSNLTAAGADSLSHLRGHNFTNAFIADLQMSLMPALVTSLYVRTAGARRAFPACAGDAMPRNHSGDEGGAGLWMKTSQHYGMKDVEAGRGTMNNATRNADSLLSAPGTTGAGGSENQRRNQGARLSLLGKPLAYSAQSGRRNARYRKLQNYLYNVLERPRAWAFVYHAFVFTLVFGCLVLSVFSTIPAHMDLSNHCLLILEFVMIVVFGLEYIIRIWSAGCCCRYRGWQGRLRFARKPFCVIDIIVLIASIAVVSAGSQGNIFATSALRSLRFLQILRMVRMDRRGGTWKLLGSVVYAHSKELVTAWYIGFLVLIFSSFLVYLVEKEFNKQFATYADALWWGTITLTTIGYGDKTPQTWTGRLLSAGFALLGISFFALPAGILGSGFALKVQE…
Pufferfish KCNQ2	Tetraodon nigroviridis	CAAE01007390	CAF90136	MVQKSRNGGVFPGAQADQKKLKVGFVGLEAGGTESSRDGALLIAGGDEGPRRQRSSISGGKRPPKRNALYRRLQNFLYNVLERPRGWAFIYHAYVFLLVFSCLVLSVFSTIREYEKSSEDALYILEVVTIVVFGVEYMVRIWAAGCCCRYRGWRGRLKFARKPFCVIDIMVLIASVSVLAAGTQGNVFATSAIRSLRFLQILRMIRMDRRGGTWKLLGSVVYAHSKELITAWYIGFLCLILASFLVYLAEKEDNEQFETYADALWWGLITLTTIGYGDKFPITWNGRLLAATFTLIGVSFFALPAGILGSGFALKVQEQHRQKHFEKRRNPAAGLIQAAWRVYATNLSRSDLTSTWDHYERSASVPMYRTDMLFVFRLIPPLNQLDLLRNLKNKSGLSF…
Pufferfish KCNQ4	Tetraodon nigroviridis	GSTENT00001226001, GSTENT00004717001	GSTENP00001226001, GSTENP00004717001, CAF90439	MLGSPSNNGGIRMLAPPAPDDERRVEFVALTAVHTERSEPSTPERGHPSHRTGLLGTPLPGPPGPRASASASSKRFRKLQNFLYNVLERPRGFAFIYHAFMFLLVFSCLVLSVFSTIPEHQKFANQGLFILEFVMIVVFGLEYFIRIWAAGCCCRYRGWQGRLRFARKPFCVIDLIVFVASLAVIAAGTQGNIFATSALRSMRFLQILRMVRMDRRGGTWKLLGSVVYAHSKELITAWYIGFLVLIFASFLVYLAEKDINTDFSTYADSLWWGTITLTTIGYGDKTPRTWQGRLLAAGFALLGVSFFALPAGILGSGFALKVQEQHRQKHFEKRRMPAANLIQVTAAAWRLYSTDASHSYLTATWYFYDSMLPSFRELTLLFSHLQRRNTKKVLHNSYH…		Ensembl database www.ensembl.org
Chicken KCNQ3	Gallus gallus	XM_418434	XP_418434	MAKYMFWTQRLFPVSHITLPPEHGWFLIVLGCLILAVLTTFKEYETVSGDWLLLLETFAIFIFGAEFALRIWAAGCCCRYKGWRGRLKFARKPLCMLDIFVLIASVPVVAVGNQGNVLATSLRSLRFLQILRMLRMDRRGGTWKLLGSAICAHSKELITAWYIGFLTLILSSFLVYLVEKDVPEKDANGVEMKEEFETYADALWWGLITLATIGYGDKTPKTWEGRLIAATFSLIGVSFFALPAGILGSGLALKVQEQHRQKHFEKRRKPAAELIQAAWRYYATNPNRIDLVATWRFYESIVSFPFFSQKLGLLDRVRGTNTKGKLFTPLNVDAIEESPSKEPKNVVLNNKERFRTAFRMKAYAFWQSSEDAGTGEPGGEERGDSSDFLMEDMIPTFKT…
Pigeon KCNQ3	Columba livia	AY768791	AAV34442	MGLKARRGAAGGSAAGGAAAAAAGRRGTASGVGDPEQGSLALGTGADRDGTLLLEGGGKEEGGKRSPPGLGLLAKTPLSRPVKRNHAKYRRIQTLIYDALERPRGWALLYHAFVFLIVLGCLILAVLTTFKEYETVSGDWLLLLETFAIFIFGAEFALRIWAAGCCCRYKGWRGRLKFARKPLCMLDIFVLIASVPVVAVGNQGNVLATSLRSLRFLQILRMLRMDRRGGTWKLLGSAICAHSKELITAWYIGFLTLILSSFLVYLVEKDVPEKDANGVEMKEEFETYADALWWGLITLATIGYGDKTPKTWEGRLIAATFSLIGVSFFALPAGILGSGLALKVQEQHRQKHFEKRRKPAAELIQAAWRYYATNPNRIDLVATWRFYESIVSFPFFRKE…
Mouse KCNQ1	Mus musculus	NM_008434	NP_032460	MDTASSPPSAERKRAGWSRLLGARRGSAVVKKCPFSLELAEGGPEGSTVYAPIAPTGAPGLAPPMSTPVSPAPAPADLGPRPRVSLDPRVSIYSARRPLLARTHIQGRVYNFLERPTGWKCFVYHFTVFLIVLVCLIFSVLSTIEQYAALATGTLFWMEIVLVVFFGTEYVVRLWSAGCRSKYVGIWGRLRFARKPISIIDLIVVVASMVVLCVGSKGQVFATSAIRGIRFLQILRMLHVDRQGGTWRLLGSVVFIHRQELITTLYIGFLGLIFSSYFVYLAEKDAVNESGRIEFGSYADALWWGVVTVTTIGYGDKVPQTWVGKTIASCFSVFAISFFALPAGILGSGFALKVQQKQRQKHFNRQIPAAASLIQTAWRCYAAENPDSATWKIYVRKPA…
Mouse KCNQ2	Mus musculus	NM_010611	NP_034741	MVQKSRNGGVYPGTSGEKKLKVGFVGLDPGAPDSTRDGALLIAGSEAPKRGSVLSKPRTGGAGAGKPPKRNAFYRKLQNFLYNVLERPRGWAFIYHAYVFLLVFSCLVLSVFSTIKEYEKSSEGALYILEIVTIVVFGVEYFVRIWAAGCCCRYRGWRGRLKFARKPFCVIDIMVLIASIAVLAAGSQGNVFATSALRSLRFLQILRMIRMDRRGGTWKLLGSVVYAHSKELVTAWYIGFLCLILASFLVYLAEKGENDHFDTYADALWWGLITLTTIGYGDKYPQTWNGRLLAATFTLIGVSFFALPAGILGSGFALKVQEQHRQKHFEKRRNPAAGLIQSAWRFYATNLSRTDLHSTWQYYERTVTVPMYSSQTQTYGASRLIPPLNQLELLRNLKS…
Mouse KCNQ3	Mus musculus	NM_152923	NP_690887	MGLKARTAAGAAGGGGGEGGGGGGGAANPAGGDSAVAGDEERKVGLAPGDVEQVTLALGAGADKDGTLLLEGGGREEGQRRTPQGIGLLAKTPLSRPVKRNNAKYRRIQTLIYDALERPRGWALLYHALVFLIVLGCLILAVLTTFKEYETVSGDWLLLLETFAIFIFGAEFALRIWAAGCCCRYKGWRGRLKFARKPLCMLDIFVLIASVPVVAVGNQGNVLATSLRSLRFLQILRMLRMDRRGGTWKLLGSAICAHSKELITAWYIGFLTLILSSFLVYLVEKDVPEMDAQGEEMKEEFETYADALWWGLITLATIGYGDKTPKTWEGRLIAATFSLIGVSFFALPAGILGSGLALKVQEQHRQKHFEKRRKPAAELIQAAWRYYATNPNRLDLVAT…
Mouse KCNQ4	Mus musculus	NM_001081142	NP_001074611	MAEAPPRRLGLGPPPGDAPRAELVALTAVQSEQGEAGGGGSPRRLGLLGSPLPPGAPLPGPGSGSGSACGGQRSSAAQKRYRRLQNWVYNVLERPRGWAFVYHVFIFLLVFSCLVLSVLSTIQEHQELANECLLILEFVMIVVFGLEYIIRVWSAGCCCRYRGWQGRFRFARKPFCVIDFIVFVASVAVIAAGTQGNIFATSALRSMRFLQILRMVRMDRRGGTWKLLGSVVYAHSKELITAWYIGFLVLIFASFLVYLAEKDANSDFSSYADSLWWGTITLTTIGYGDKTPHTWLGRVLAAGFALLGISFFALPAGILGSGFALKVQEQHRQKHFEKRRMPAANLIQAAWRLYSTDTSRAYLTATWYYYDSILPSFRELALLFEHIQRARNGGLRPLE…
Mouse KCNQ5	Mus musculus	AY679158	AAT76442	MPRHHAGGEEGGAAGLWVRSGAAAAAGAGGGRPGSGMKDVESGRGRVLLNSAAARGDGLLLLGTRAAALGGGGGGLRESRRGKQGARMSLLGKPLSYTSSQSCRRNVKYRRVQNYLYNVLERPRGWAFVYHAFVFLLVFGCLILSVFSTIPEHTKLASSCLLILEFVMIVVFGLEFIIRIWSAGCCCRYRGWQGRLRFARKPFCVIDTIVLIASIAVVSAKTQGNIFATSALRSLRFLQILRMVRMDRRGGTWKLLGSVVYAHSKELITAWYIGFLVLIFSSFLVYLVEKDANKEFSTYADALWWGTITLTTIGYGDKTPLTWLGRLLSAGFALLGISFFALPAGILGSGFALKVQEQHRQKHFEKRRNPAANLIQCVWRSYAADEKSVSIATWKPHLK…
Monkey KCNQ2	Macaca fascicularis	XR_014231		MLAIKVQWKFFKRKGAPAPGFRAQRSPRSAVAQHQAGLGGCEGLRHGYPAQRMVPSDPQNGAAGFGISGGRMRVEGFSAQMVPAHSQSCCSSCKLWMTLAALVTQALLVGGKPSLPAMVCAGATVPPSRLQGGQWEKPQGTRAAGGRSPCGSLSAGVGETKRGLWGQMNWPRSAGAASPGSAAFMFSGRLVQPSDVRGWGGLEVTSLEEIREWAGLAGSGERTVLEVLKGQRPCGIRCHPGRLGEDRLSPPLELGATPNLGSHVALTSNLRRLLPQEGLRTARALPRDTGYGKDQRRQPACEGRCRGALFLLCTDVLSLPEHTGLVPPPLKTERNRSCLGQAHFMLVITAHVWAQRQGGGGPERAPECALACVGFVGLDPGAPDSTRDGALLIAGSEAP…
Monkey KCNQ3	Macaca fascicularis	XM_001089122	XP_001089122	MNHEPEGRGSHQLRHPRAGAFAVRSALANPTTWILPLKPRIRGEAPTPTQARGAGLCGRLAHCLAVTGTAAAQEIRGPQTIRGGGRWEEAGRRRPGLPPRRGGTMGPHPGDAAAAGDEERKVGLAPGDVEQVTLALGAGADKDGTLLLEGGGRDEGQRRTPQGIGLLAKTPLTRPVKRNNAKYRRIQTLIYDALERPRGWALLYHALVFLIVLGCLILAVLTTFKEYETVSGDWLLLLETFAIFIFGAEFALRIWAAGCCCRYKGWRGRLKFARKPLCMLDIFVLIASVPVVAVGNQGNVLATSLRSLRFLQILRMLRMDRRGGTWKLLGSAICAHSKELITAWYIGFLTLILSSFLVYLVEKDVPEVDAQGEEMKEEFETYADALWWGLITLATIGYG…
Monkey KCNQ5	Macaca fascicularis		AAZ29030	QGEASSSQKLSFKERVRMASPRGQSIKSRQASVGDRRSPSTDITAEGSPTKVQKSWSFNDRTRFRPSLRLKSSQPKPVIDADTALGTDDVYDEKGCQCDVSVEDLTPPLKTVIRAIRIMKFHVAKRKFKETLRPYDVKDVIEQYSAGHLDMLCRIKSLQTRVDQILGKGQITSDKKSREKITAEHETTDDLSMLGRVVKVEKQVQSIESKLDCLLDIYQQVLRKGSASALALASFQIPPFECEQTSDYQSPVDSKDLSGSTQNSGCLSRSTSANISRGLQFILTPNEFSAQTFYALSPTMHSQATQVPMSQSDGSAVAATNTVANQINTAPKPAAPTTLQIPPPLPAIKHLPRPETLHPNPAGLQESISDVTTCLVASKENVQVAQSNLAKDRSMRKSF…
Human KCNQ1	Homo sapiens	NM_000218	NP_000209	MAAASSPPRAERKRWGWGRLPGARRGSAGLAKKCPFSLELAEGGPAGGALYAPIAPGAPGPAPPASPAAPAAPPVASDLGPRPPVSLDPRVSIYSTRRPVLARTHVQGRVYNFLERPTGWKCFVYHFAVFLIVLVCLIFSVLSTIEQYAALATGTLFWMEIVLVVFFGTEYVVRLWSAGCRSKYVGLWGRLRFARKPISIIDLIVVVASMVVLCVGSKGQVFATSAIRGIRFLQILRMLHVDRQGGTWRLLGSVVFIHRQELITTLYIGFLGLIFSSYFVYLAEKDAVNESGRVEFGSYADALWWGVVTVTTIGYGDKVPQTWVGKTIASCFSVFAISFFALPAGILGSGFALKVQQKQRQKHFNRQIPAAASLIQTAWRCYAAENPDSSTWKIYIRKA…
Human KCNQ2	Homo sapiens	AF033348	AAB97315 ERROR	MVQKSRNGGVYPGPSGEKKLKVGFVGLDPGAPDSTRDGALLIAGSEAPKRGSILSKPRAGGAGAGKPPKRNAFYRKLQNFLYNVLERPRGWAFIYHAYVFLLVFSCLVLSVFSTIKEYEKSSEGALYILEIVTIVVFGVEYFVRIWAAGCCCRYRGWRGRLKFARKPFCVIDIMVLIASIAVLAAGSQGNVFATSALRSLRFLQILRMIRMDRRGGTWKLLGSVVYAHSKELVTAWYIGFLCLILASFLVYLAEKGENDHFDTYADALWWGLITLTTIGYGDKYPQTWNGRLLAATFTLIGVSFFALPAGILGSGFALKVQEQHRQKHFEKRRNPAAGLIQSAWRFXATNLSRTDLHSTWQYYERTVTVPMYSSQTQTYGASRLIPPLNQLELLRNLKS…
Human KCNQ3	Homo sapiens	NM_004519	NP_004510	MGLKARRAAGAAGGGGDGGGGGGGAANPAGGDAAAAGDEERKVGLAPGDVEQVTLALGAGADKDGTLLLEGGGRDEGQRRTPQGIGLLAKTPLSRPVKRNNAKYRRIQTLIYDALERPRGWALLYHALVFLIVLGCLILAVLTTFKEYETVSGDWLLLLETFAIFIFGAEFALRIWAAGCCCRYKGWRGRLKFARKPLCMLDIFVLIASVPVVAVGNQGNVLATSLRSLRFLQILRMLRMDRRGGTWKLLGSAICAHSKELITAWYIGFLTLILSSFLVYLVEKDVPEVDAQGEEMKEEFETYADALWWGLITLATIGYGDKTPKTWEGRLIAATFSLIGVSFFALPAGILGSGLALKVQEQHRQKHFEKRRKPAAELIQAAWRYYATNPNRIDLVATW…
Human KCNQ4	Homo sapiens	AF105202	AAD14680	MAEAPPRRLGLGPPPGDAPRAELVALTAVQSEQGEAGGGGSPRRLGLLGSPLPPGAPLPGPGSGSGSACGQRSSAAHKRYRRLQNWVYNVLERPRGWAFVYHVFIFLLVFSCLVLSVLSTIQEHQELANECLLILEFVMIVVFGLEYIVRVWSAGCCCRYRGWQGRFRFARKPFCVIDFIVFVASVAVIAAGTQGNIFATSALRSMRFLQILRMVRMDRRGGTWKLLGSVVYAHSKELITAWYIGFLVLIFASFLVYLAEKDANSDFSSYADSLWWGTITLTTIGYGDKTPHTWLGRVLAAGFALLGISFFALPAGILGSGFALKVQEQHRQKHFEKRRMPAANLIQAAWRLYSTDMSRAYLTATWYYYDSILPSFRELALLFEHVQRARNGGLRPLEV…
Human KCNQ5	Homo sapiens	AF249278	AAF91335	MPRHHAGGEEGGAAGLWVKSGAAAAAAGGGRLGSGMKDVESGRGRVLLNSAAARGDGLLLLGTRAATLGGGGGGLRESRRGKQGARMSLLGSRLSYTSSQSCRRNVKYRRVQNYLYNVLERPRGWAFIYHAFVFLLVFGCLILSVFSTIPEHTKLASSCLLILEFVMIVVFGLEFIIRIWSAGCCCRYRGWQGRLRFARKPFCVIDTIVLIASIAVVSAKTQGNIFATSALRSLRFLQILRMVRMDRRGGTWKLLGSVVYAHSKELITAWYIGFLVLIFSSFLVYLVEKDANKEFSTYADALWWGTITLTTIGYGDKTPLTWLGRLLSAGFALLGISFFALPAGILGSGFALKVQEQHRQKHFEKRRNPAANLIQCVWRSYAADEKSVSIATWKPHLKA…
